# Supplementary material for: WITHDRAWN: Sustainable Microwave-Assisted Synthesis of Azo-Chalcone Dyestuff Using an Mn-Based Metal Organic Framework as a Catalyst: A Combined Experimental and DFT Study and Biomedical Applications
Source: Research Square preprint supplement (doi:10.21203/rs.3.rs-7972753/v1), 2025-11-12
Supplement: Supplementary file 1 [file 3ce1d4a03115c61deee1a47c.docx]

**Sustainable Microwave-Assisted Synthesis of Azo Chalcone Dyestuff Using an Mn-Based Metal Organic Framework as a Catalyst: A Combined Experimental and DFT Study and Biomedical Applications.**

[
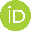
](https://orcid.org/0000-0002-6866-4116)[
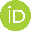
](https://orcid.org/0000-0001-6237-1016)[
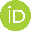
](https://orcid.org/0009-0002-3990-5328)[
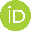
](https://orcid.org/my-orcid?orcid=0000-0002-7314-7260)**Myasar Kh. Ibrahim1**  [
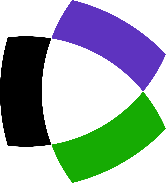
](https://www.webofscience.com/wos/author/record/IAM-1259-2023#:~:text=Web%20of%20Science%20ResearcherIDIAM%2D1259%2D2023) **. Sameera Sh. Mohammed Amin2  .Shireen R. Mohammed2 . Khalid Omer3**

1. Department of Basic Science, College of Agricultural Engineering Sciences, University of Duhok, Kurdistan Region, Iraq.
2. Department of Chemistry, College of Science, University of Zakho, Zakho 42002, Kurdistan Region, Iraq.
3. Department of Chemistry, College of Science, University of Sulaimani, Qliasan St. 46002, Sulaymaniyah, Kurdistan region, Iraq.

E-mail: Myasar Kh. Ibrahim

[Myasar.ibrahim@uod.ac](mailto:Myasar.ibrahim@uod.ac)

**Supplementary**


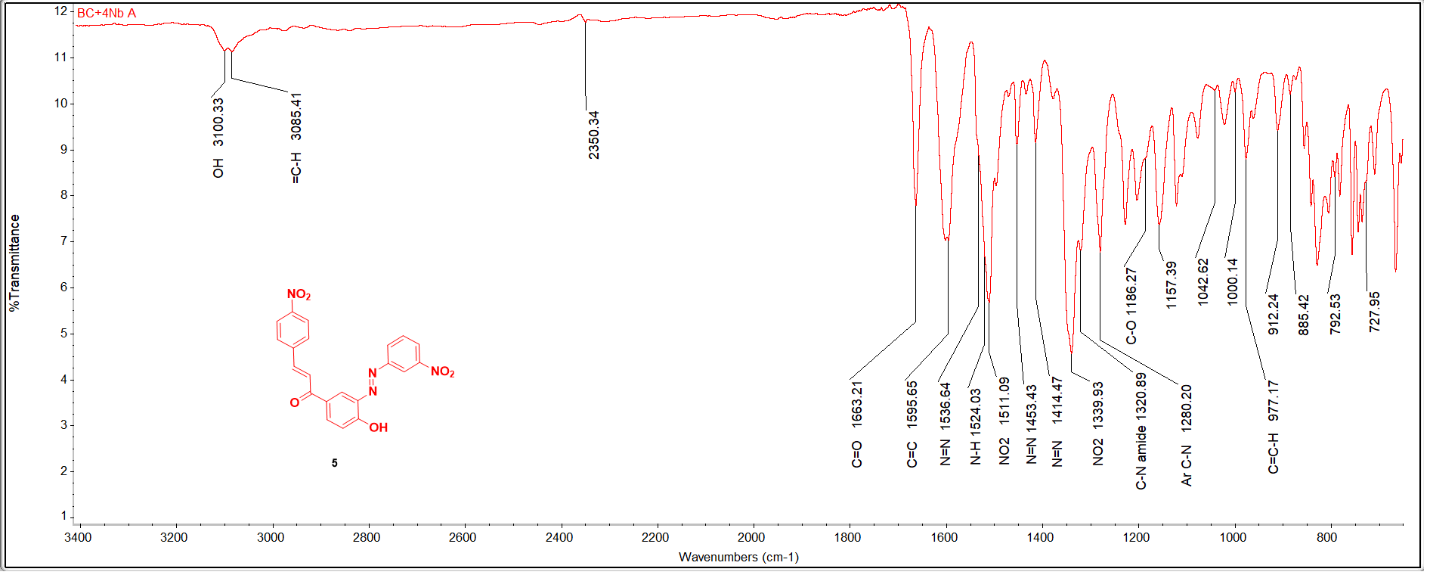


**Fig. S1**. FTIR spectrum for azo chalcone **5** with more detailed assignment.


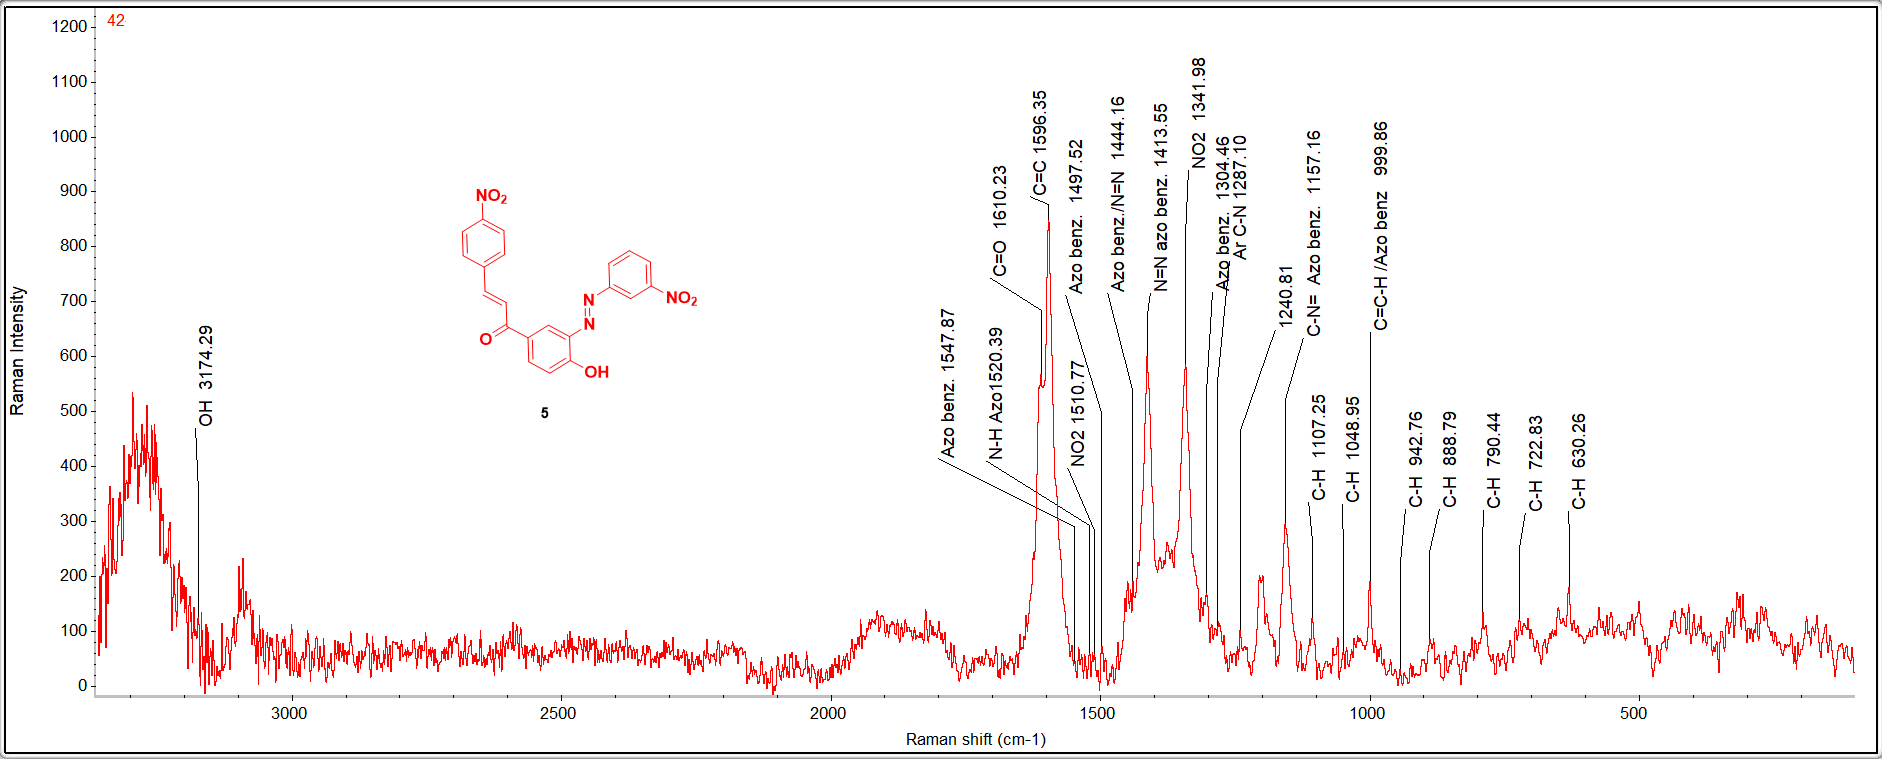


**Fig. S2**. FT-Raman spectrum for azo chalcone **5** with more detailed assignment.


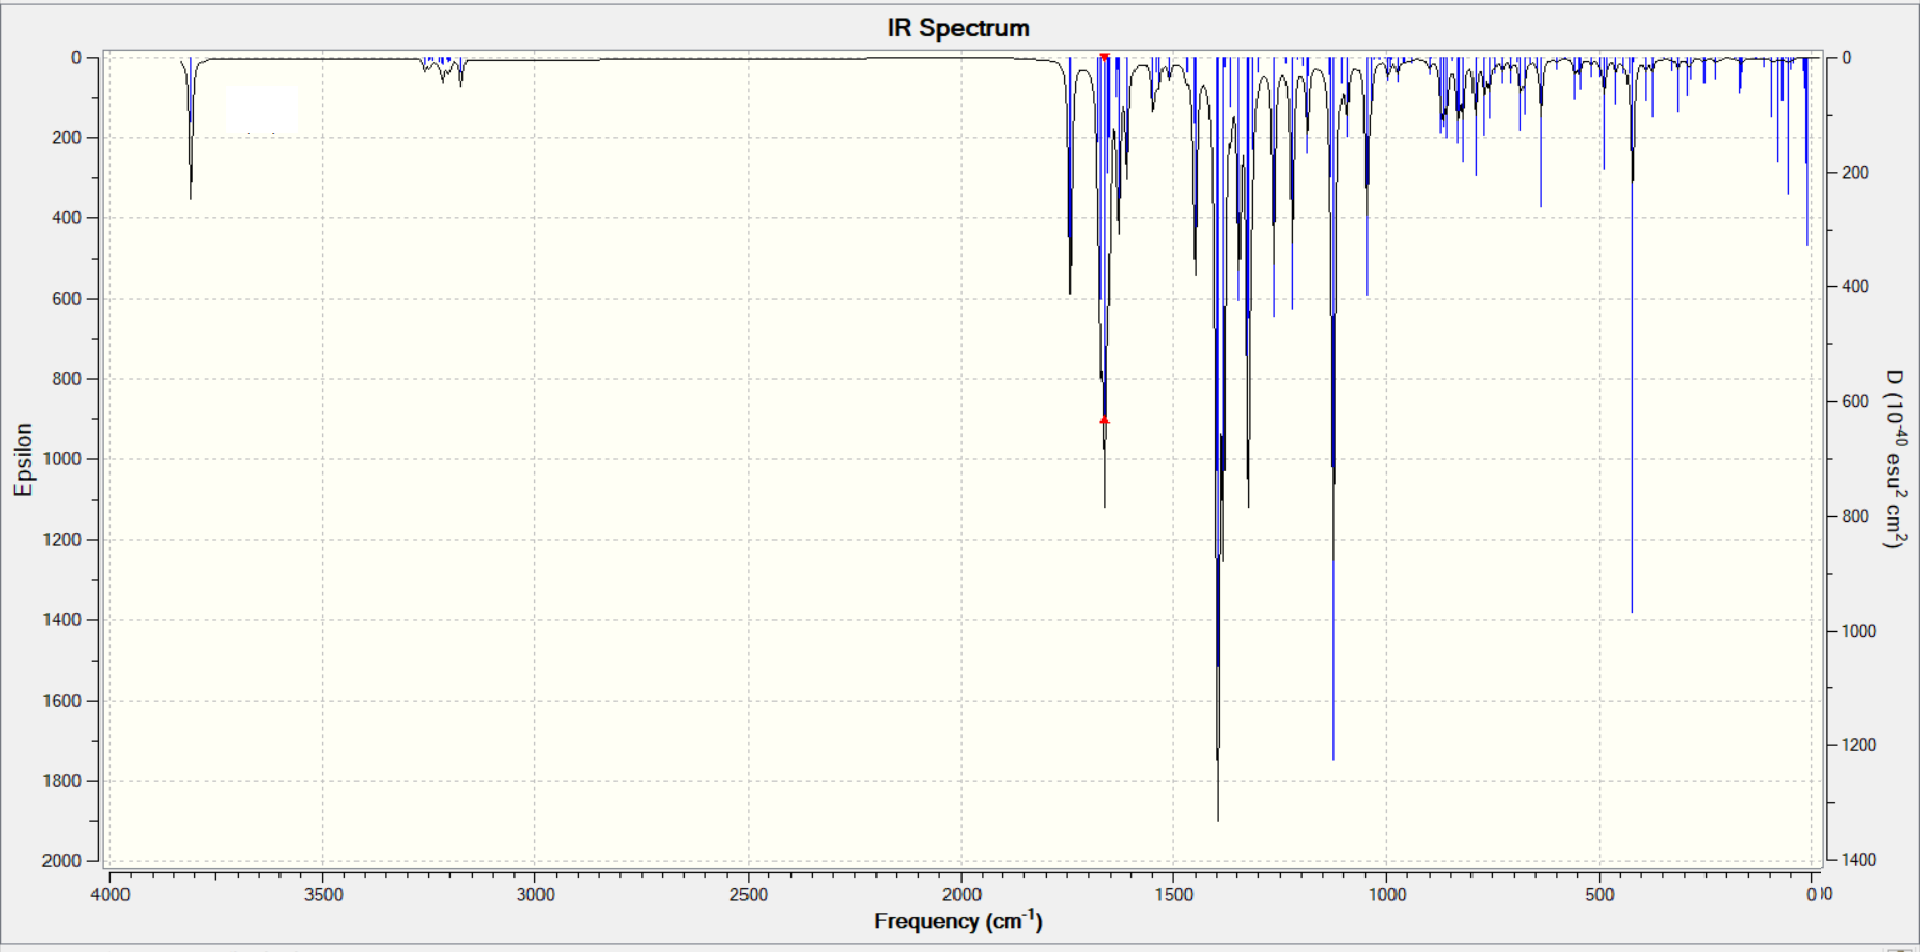


**Fig. S3**. Theoretical FTIR spectrum of azo-chalcone **5** calculated using B3LYP / 6-31G(d,p).


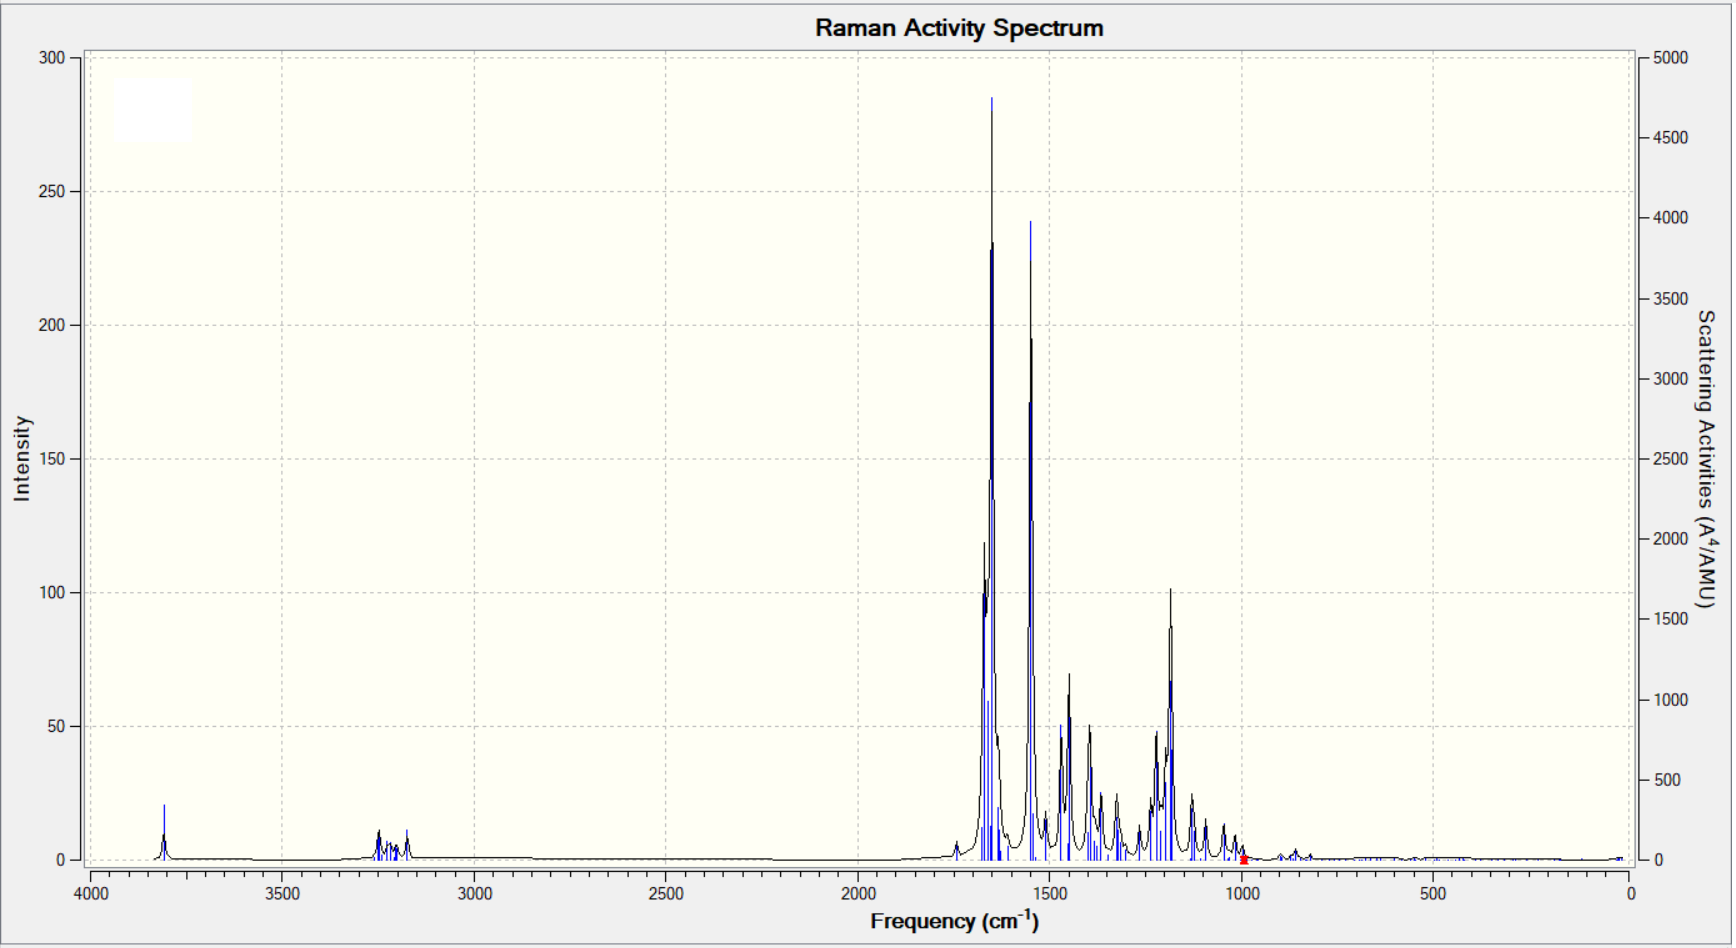


**Fig. S4**. Theoretical Raman spectrum of azo-chalcone **5** calculated using B3LYP / 6-31G(d,p).


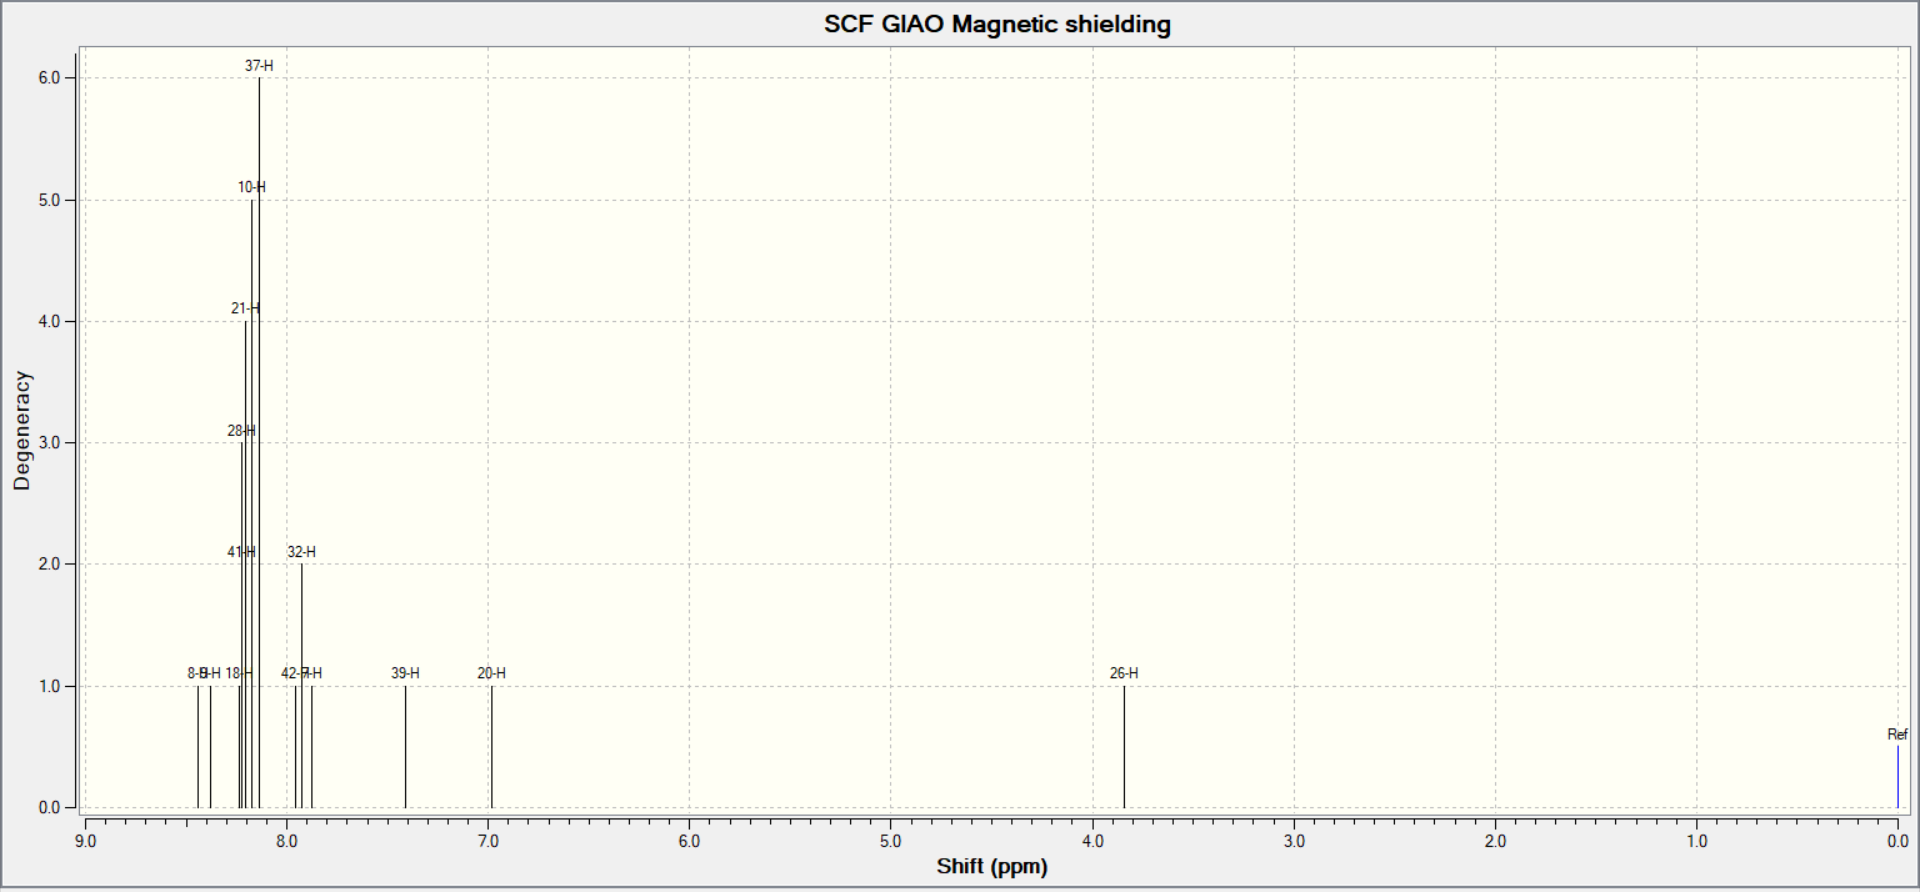


**Fig. S5**. Theoretical 1H NMR spectrum of synthesis azo-chalcone **5** using B3LYP/6-31G level in CHCl3.


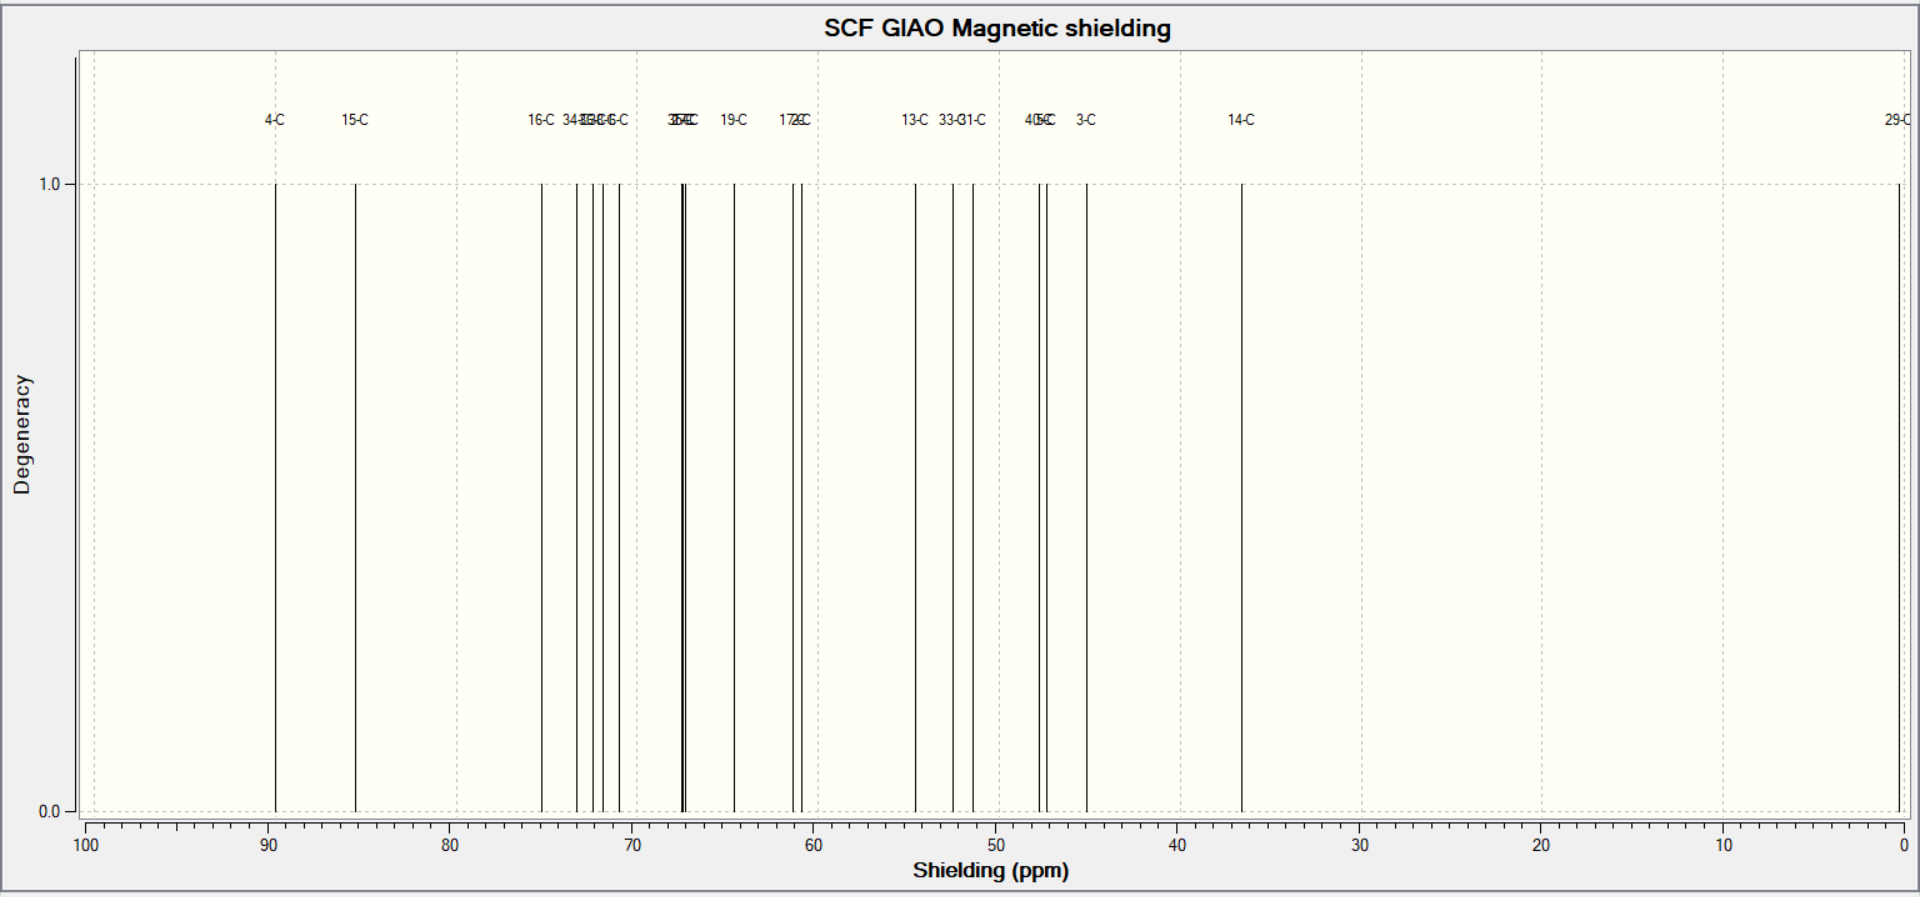


**Fig. S6**. Theoretical 13CNMR spectrum of synthesis azo-chalcone **5** using B3LYP/6-31G level in CHCl3.
